# Supplementary material for: Cyanide-metal framework derived CoMoO4/Co3O4 hollow porous octahedrons as advanced anodes for high performance lithium ion batteries
Source: Royal Society of Chemistry journal article supplement (doi:10.1039/c7ta08868j), 2017-12-08
Supplement: c7ta08868j1.pdf [file c7ta08868j1.pdf]

## SUPPORTING INFORMATION

### **Cyanide-metal framework derived CoMoO<sub>4</sub>/Co<sub>3</sub>O<sub>4</sub> hollow porous octahedrons as advanced anode for high performance lithium ion batteries**

*Yingying Chen,<sup>a,b</sup> Yue Wang,<sup>b</sup> Xiaoping Shen,<sup>\*a</sup> Rong Cai,<sup>b</sup> Hongxun Yang,<sup>b</sup> Keqiang Xu,<sup>a</sup> Aihua Yuan,<sup>b</sup> and Zhenyuan Ji<sup>a</sup>*

*<sup>a</sup> School of Chemistry & Chemical Engineering, School of Material Science and Engineering, Jiangsu University, Zhenjiang 212013, PR China*

*<sup>b</sup> School of Environmental & Chemical Engineering, Jiangsu University of Science and Technology, Zhenjiang 212003, PR China*

\*Corresponding author: Xiaoping Shen,

Email address: [xiaopingshen@163.com](mailto:xiaopingshen@163.com)

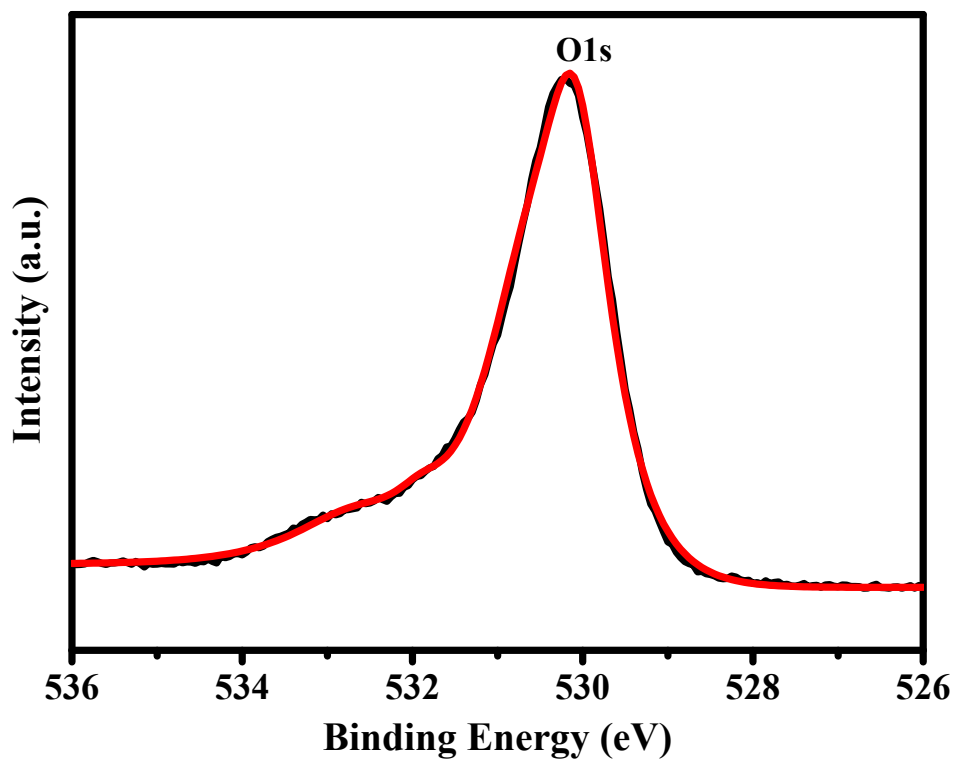

**Fig. S1** O 1s XPS spectrum

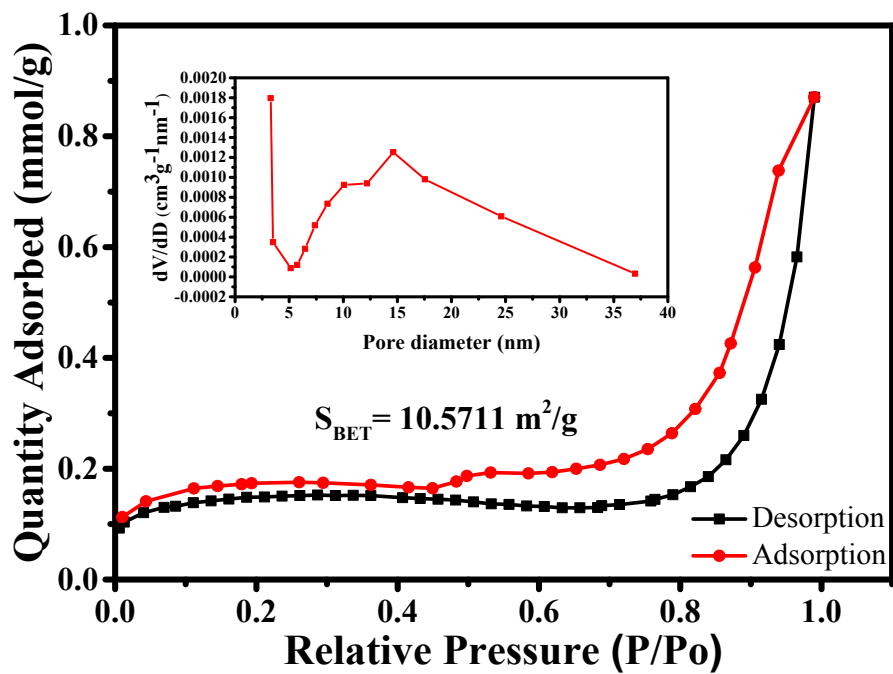

**Fig. S2** N<sub>2</sub> adsorption/desorption isotherms (77 K) of Co<sub>2</sub>[Mo(CN)<sub>8</sub>]·xH<sub>2</sub>O. The inset shows the corresponding pore size distribution.

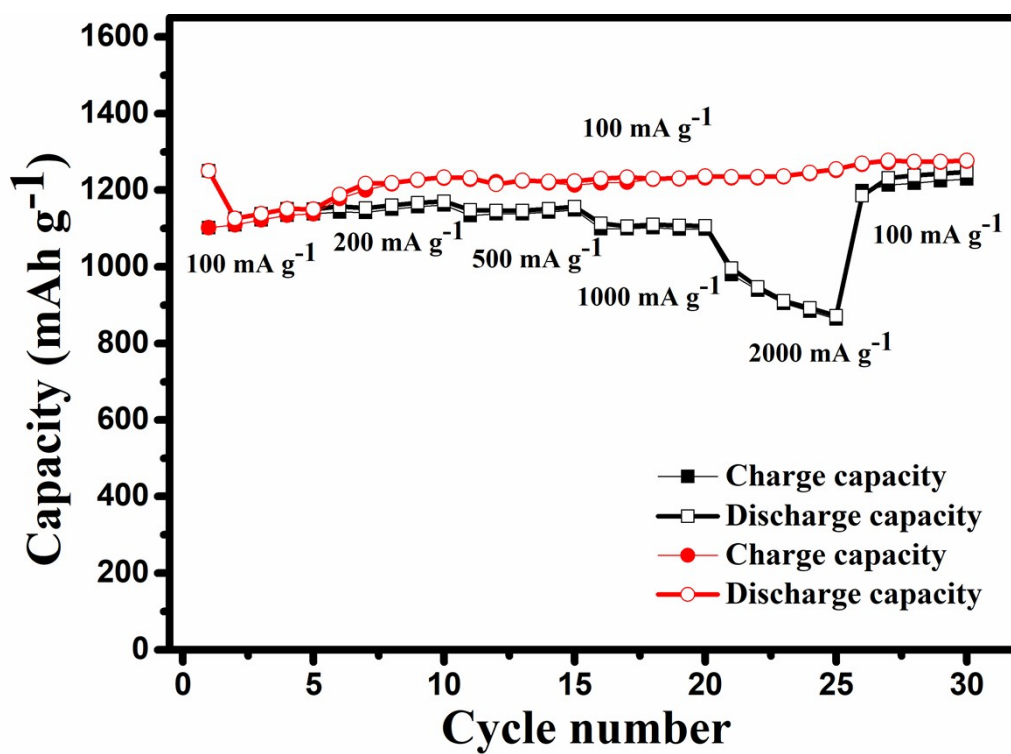

**Fig. S3** Rate capability of  $\text{CoMoO}_4/\text{Co}_3\text{O}_4$  hollow porous octahedrons as anode materials for LIBs at different current densities and cycling performance over 30 cycles at  $100 \text{ mA g}^{-1}$ .

**Table S1.** Elemental composition of the CoMoO<sub>4</sub>/Co<sub>3</sub>O<sub>4</sub> composite measured by EDS.

| Elements | Weight% | Atom% |
|----------|---------|-------|
| Co       | 39.6    | 24.2  |
| Mo       | 32.2    | 12.1  |
| O        | 28.2    | 63.7  |

**Table S2** Comparison of electrochemical performances of CoMoO<sub>4</sub>/Co<sub>3</sub>O<sub>4</sub> hollow porous octahedrons with previously reported Mo-based electrodes for LIB.

| Electrode material                                 | Initial discharge capacity<br>(mA h g <sup>-1</sup> ) | Current density<br>(mA g <sup>-1</sup> ) | Coulombic efficiency<br>(%) | capacity retention<br>%/cycle | Ref.      |
|----------------------------------------------------|-------------------------------------------------------|------------------------------------------|-----------------------------|-------------------------------|-----------|
| Co <sub>3</sub> O <sub>4</sub> @CoMoO <sub>4</sub> | 1175.1                                                | 200                                      | 86.9                        | 96.1/100                      | this work |
| CoMoO <sub>4</sub> hollow nanostructure            | 1151                                                  | 500                                      | 72                          | 93 / 200                      | 1         |
| Rattle –type CoMoO <sub>4</sub> microspheres       | 1019                                                  | 500                                      | 83                          | 100 /150                      | 2         |
| CoMoO <sub>4</sub> –carbon microspheres            | 896                                                   | 500                                      | 72                          | 90 /150                       | 2         |
| 3D CoMoO <sub>4</sub>                              | 1083                                                  | 100                                      | 83.6                        | 87.6/200                      | 3         |
| CoMoO <sub>4</sub> /carbon fabric                  | 1148                                                  | 100                                      | 83.5                        | 87.7/150                      | 4         |
| CoMoO <sub>4</sub>                                 | 1035                                                  | 100                                      | 76.4                        | 95.6/ 50                      | 5         |
| CoMoO <sub>4</sub> -G                              | 1046                                                  | 100                                      | 82.7                        | 95.6/ 50                      | 6         |
| CoMoO <sub>4</sub> /rGO                            | 1211                                                  | 100                                      | 80.9                        | <50/ 100                      | 7         |
| CoMoO <sub>4</sub>                                 | 1021                                                  | 100                                      | 72.9                        | <50/100                       | 7         |

1 Y. S. Wang, Y. F. Sun, X. Zhang, Y. H. Wen, J. X. Guo, *RSC Adv.*, 2016, **6**, 51710–51715.

2 Y. N. Ko, Y. C. Kang and S. B. Park, *RSC Adv.*, 2014, **4**, 17873–17878.

3 H. Yu, C. Guan, X. H. Rui, B. Ouyang, B. Yadian, Y. Z. Huang, H. Zhang, H. E. Hoster, H. J. Fan and Q.Y. Yan, *Nanoscale*, 2014, **6**, 10556–10561.

4 B. Wang, S. M. Li, X. Y. Wu, J. H. Liu, W. N. Tian and J. Chen, *New J. Chem.*, 2016, **40**, 2259–2267.

5 C. T. Cherian, M. V. Reddy, S. C. Haur and B. V. R. Chowdari, *ACS Appl. Mater. Interfaces*, 2013, **5**, 918–923.

6 J. Guo, H. Zhu, S. Zhou, Y. Sun and X. Zhang, *Ionics*, 2015, **21**, 2993–2999.

7 T. Yang, H. N. Zhang, Y. Z. Luo, L. Mei, D. Guo, Q. H. Li and T. H. Wang, *Electrochim. Acta.*, 2015, **158**, 327–332.

**Table S3** Comparison of capacity performances of CoMoO<sub>4</sub>/Co<sub>3</sub>O<sub>4</sub> hollow porous octahedrons with previously reported pure Co<sub>3</sub>O<sub>4</sub> and MoO<sub>3</sub> nanostructured materials.

| Electrode material                                     | Initial discharge capacity (mA h g <sup>-1</sup> ) | Current density (mA g <sup>-1</sup> ) | Coulombic efficiency (%) | capacity retention %/cycle | Ref.      |
|--------------------------------------------------------|----------------------------------------------------|---------------------------------------|--------------------------|----------------------------|-----------|
| Co <sub>3</sub> O <sub>4</sub> @CoMoO <sub>4</sub>     | 1175.1                                             | 200                                   | 86.9                     | 96.1/100                   | this work |
| Mesoporous Co <sub>3</sub> O <sub>4</sub> octahedrons  | 1567                                               | 200                                   | 76.3                     | 76/60                      | 8         |
| Co <sub>3</sub> O <sub>4</sub> hollow octahedral cages | 1100.1                                             | 178                                   | 75.6                     | 58.1/50                    | 9         |
| Co <sub>3</sub> O <sub>4</sub> nano-octahedrons        | 1118.5                                             | 100                                   | 73.1                     | 85.4/200                   | 10        |
| Co <sub>3</sub> O <sub>4</sub> micro-octahedra         | 896.2                                              | 100                                   | 46.8                     | 32.2/200                   | 10        |
| Co <sub>3</sub> O <sub>4</sub> octahedrons             | 1098                                               | 100                                   | 90.2                     | 86.1/50                    | 11        |
| Porous Co <sub>3</sub> O <sub>4</sub> nanobelts        | 2307                                               | 100                                   | 54                       | 37.1/60                    | 12        |
| Porous tubular Co <sub>3</sub> O <sub>4</sub>          | 1254                                               | 100                                   | 71.6                     | 48.8/100                   | 13        |
| Co <sub>3</sub> O <sub>4</sub> nanoparticles           | 1151                                               | 100                                   | --                       | 65.1/50                    | 14        |
| Co <sub>3</sub> O <sub>4</sub> microfibers             | 1177.4                                             | 100                                   | 82.9                     | 76.6/200                   | 15        |
| MoO <sub>3</sub> nanorods                              | 1418.3                                             | 150                                   | 65.2                     | 55/150                     | 16        |
| a-MoO <sub>3</sub> nanorod                             | 1182                                               | 30                                    | 99.45                    | 58.8/189                   | 17        |
| a-MoO <sub>3</sub> nanoflower                          | 1432.5                                             | 550                                   | 71.2                     | 56.6/100                   | 18        |
| MoO <sub>3</sub> nanorods                              | 1461.3                                             | 550                                   | 63.8                     | 14.6/100                   | 19        |
| MoO <sub>3</sub> nanobelt                              | 300                                                | 30                                    | --                       | 55.5/50                    | 20        |

8 J. X. Guo, L. Chen, X Zhang, B. Jiang and L. Z. Ma, *Electrochim. Acta.*, 2014, **129**, 410–415.

9 X. Wang, L. Yu, X. L. Wu, F. Yuan, Y. G. Guo, Y. Ma and J. Yao, *J. Phys. Chem. C*, 2009, **113**, 15553–15558.

10 G. L. Xu, J. T. Li, L. Huang, W. Lin and S. G. Sun, *Nano Energy*, 2013, **2**, 394–402.

11 X. L. Xiao, X. F. Liu, H. Zhao, D. F. Chen, F. Z. Liu, J. H. Xiang, Z. B. Hu, and Y. D. Li, *Adv. Mater.*, 2012, **24**, 5762–5766

12 F. C. Zheng, K. Shi, S. Xu, X.Y. Liang, Y.C. Chen and Y.G. Zhang, *RSC Adv.*, 2016, **6**, 9640–9646.

13 X. Zhang, Z. Yang, C. Li, A.J.Xie and Y.H. Shen, *Appl. Surface Sci.*, 2017, **403**, 294–301.

- 14 B. Yan, L. Chen, Y. J. Liu, G. X. Zhu, C. G. Wang, J. H. Zhang, G. Yang, H. T. Ye and A. H. Yuan, *Crystengcom*, 2014, **16**, 10227–10234.
- 15 Y. Y. Chen, Y. Wang, H. X. Yang, H. Gan, X. W. Cai, X. M. Guo, B. Xu, M. F. Lü and A. H. Yuan, *Ceram. Int.*, 2017, **43**, 9945–9950.
- 16 J. B. Zhou, N. Lin, L. B. Wang, K. Zhang, Y. C. Zhu and Y. T. Qian, *J. Mater. Chem. A*, 2015, **3**, 7463–7468.
- 17 R. Nadimicherla, R. H. Zha, L. Wei and X. Guo, *J. Alloys Compd.*, 2016, **687**, 79–86.
- 18 Q. D. Yang, H. T. Xue, X. Yang, Z. Q. Guan, Y. H. Cheng, S. W. Tsang and C. S. Lee, *Electrochim. Acta.*, 2015, **185**, 83–89.
- 19 R. Nadimicherla, Y. L. Liu, K. Q. Chen and W. Chen, *Solid State Sciences*, 2014, **34**, 43–48.
- 20 J. F. Huang, J. W. Yan, J. Y. Li, L. Y. Cao, Z. W. Xu, J. P. Wu, L. Zhou and Y. J. Luo, *J. Alloys Compd.*, 2016, **688**, 588–595.
